# Supplementary material
Source: Springer Nature journal article supplement (https://www.springermedizin.de/resource/supplementary/13041_2014_291_MOESM8_ESM.pdf/25657922)
Supplement: MOESM8 [file 25657922]

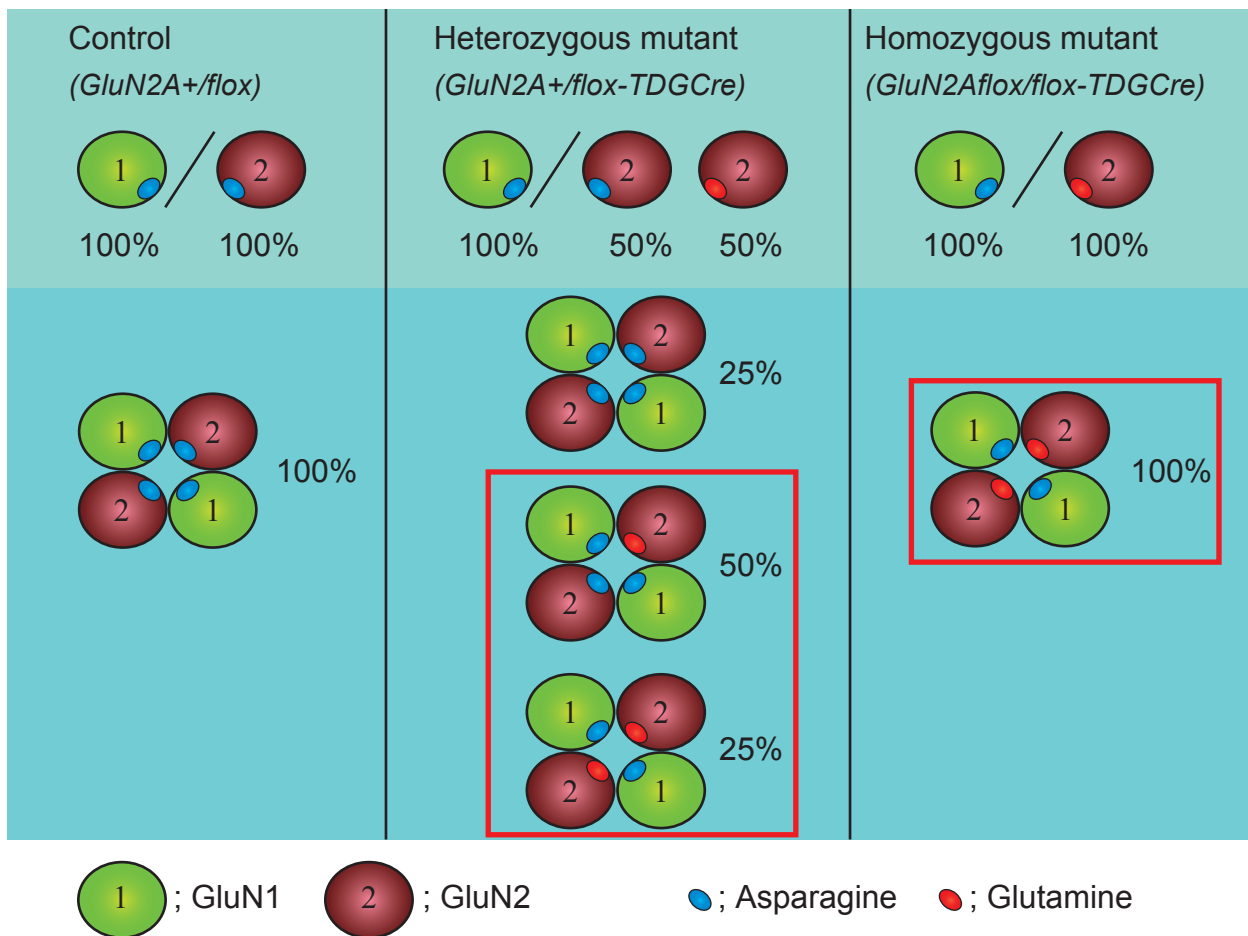

**Fig.S8 NMDA receptors formed with the wild type GluN2A (N) or the mutant GluN2A(Q) subunit.**

In Cre-expressing cells of *GluN2A+/flox* mice, NMDA receptors will consist of the three populations (middle column). Left column and right column shows the *GluN2A+/flox* and *GluN2A<sup>flox</sup>/flox-TDGCre* mice respectively.
